# Supplementary material for: Exosomal PGAM1 promotes prostate cancer angiogenesis and metastasis by interacting with ACTG1
Source: PubMed Central journal article supplement (PMC10403531; doi:10.1038/s41419-023-06007-4), 2023-08-04

F1(C)

PGAM1

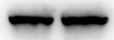

DU145-CM—Plasma

F1(C)

CD63

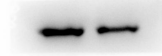

DU145-CM—Plasma

F1(C)

HSP70

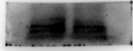

DU145-CM—Plasma

F1(C)

Calnexin

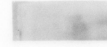

DU145-CM—Plasma

F1(D)

PGAM1

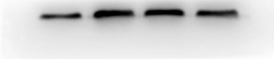

RWPE-1—DU145—PC3—C4-2

F1(D)

Tubulin

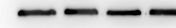

RWPE-1—DU145—PC3—C4-2

F1(E)

PGAM1

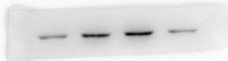

Exosomes  
RWPE-1—DU145—PC3—C4-2

F1(E)

CD63

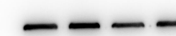

Exosomes  
RWPE-1—DU145—PC3—C4-2

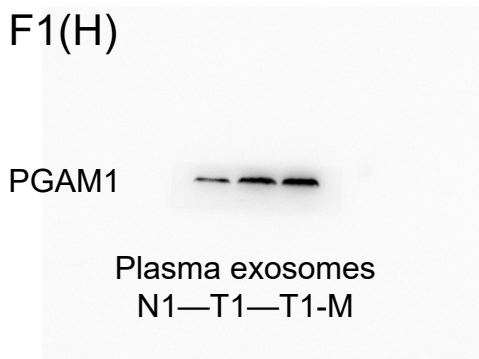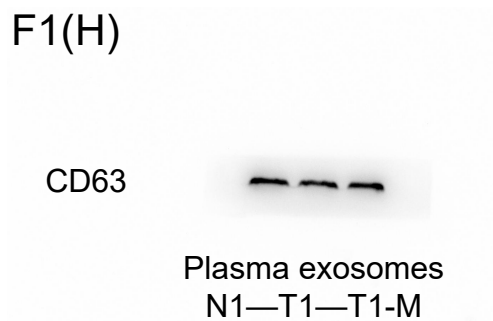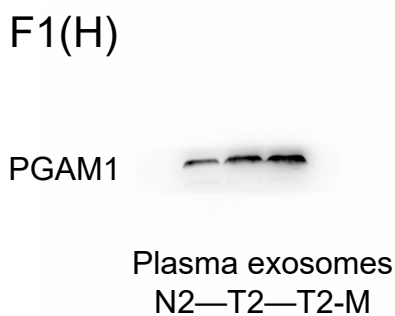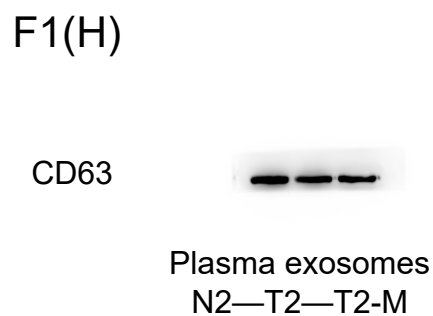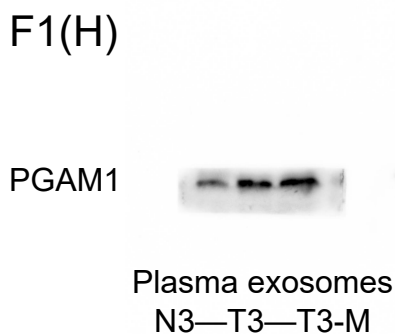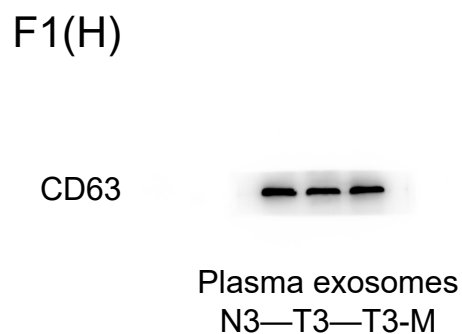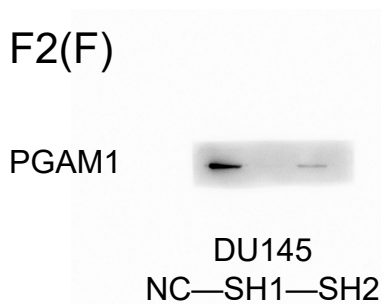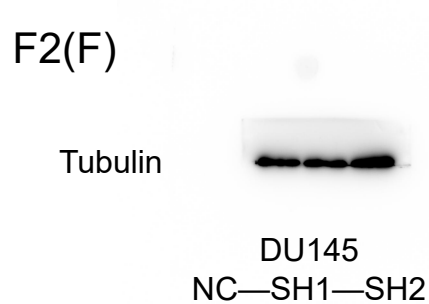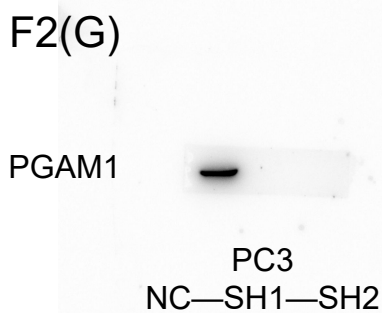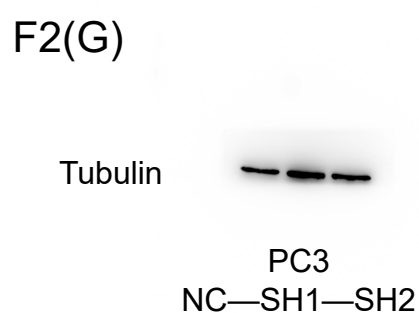

F2(H)

PGAM1

DU145-Exosomes  
NC—SH1—SH2

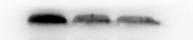

F2(H)

CD63

DU145-Exosomes  
NC—SH1—SH2

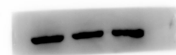

F2(I)

PGAM1

PC3-Exosomes  
NC—SH1—SH2

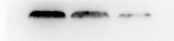

F2(I)

CD63

DU145-Exosomes  
NC—SH1—SH2

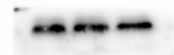

F2(J)

PGAM1

HUVEC+DU145-Exosomes  
NC—SH1—SH2—PBS

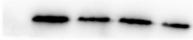

F2(J)

GAPDH

HUVEC+DU145-Exosomes  
NC—SH1—SH2—PBS

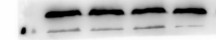

F4(F)

HUVEC

IP  
PGAM1—IgG—Input

IB:PGAM1

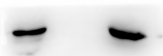

IP  
ACTG1—IgG—Input

IB:ACTG1

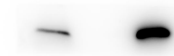

IB:ACTG1

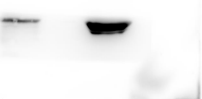

IB:PGAM1

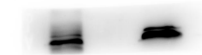

F4(G)

DU145

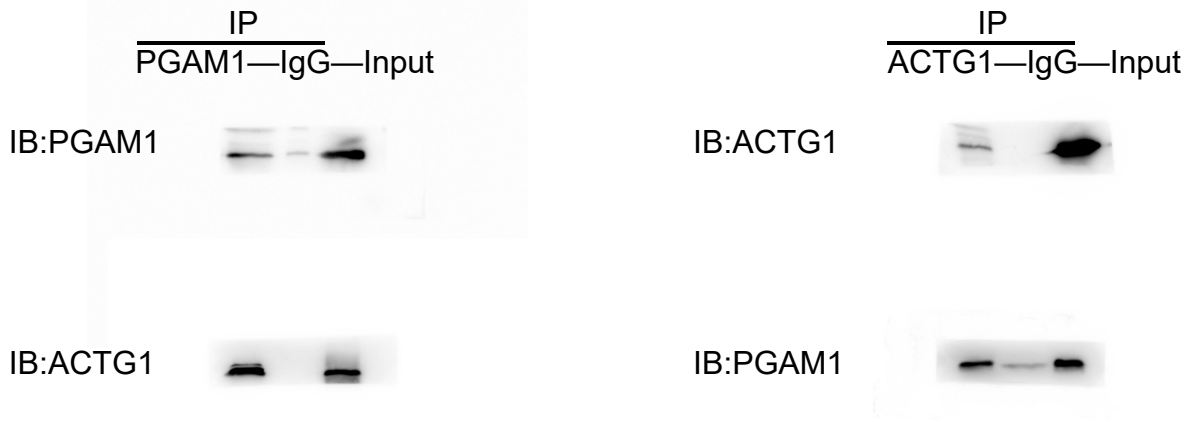

F4(H)

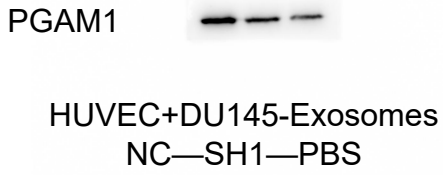

F4(H)

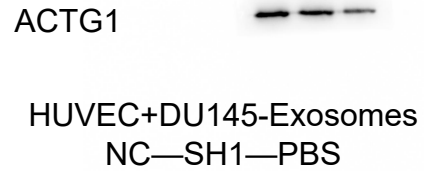

F4(H)

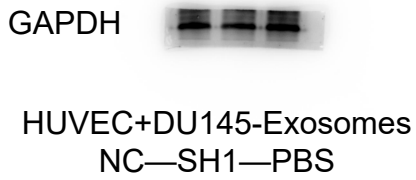

Supplement: 41419_2023_6007_MOESM1_ESM.pdf [file 41419_2023_6007_MOESM1_ESM.pdf]
